# Supplementary material
Source: PubMed Central journal article supplement (PMC6360138)
Supplement: NIHMS1502871-supplement-supplement_1.pdf [file NIHMS1502871-supplement-supplement_1.pdf]

**Supplementary Figure. Association of FLIP panometry with high-resolution**

**manometry (HRM) parameters and acid exposure.** Each subject is represented by a row; subjects are listed by increasing esophagogastric junction (EGJ) distensibility indices (DI). Repetitive antegrade contractions (RACs) presence and occlusion status by distension volume are displayed, as are the EGJ-DI from the 60-ml fill volume, high-resolution manometry (HRM) motility diagnoses, median integrated relaxation pressure (IRP) and median distal contractile integral (DCI) values from the 10-supine swallows on HRM, and 24-hour acid exposure time (AET).

The correlations of EGJ-DI with median IRP, basal EGJ pressure, and AET were -0.67 ( $P = 0.001$ ), -0.42 ( $P = 0.067$ ), and -0.17 ( $P = 0.49$ ) respectively. The correlations of maximum EGJ diameter with median IRP, basal EGJ pressure, and AET were -0.739 ( $P < 0.001$ ), -0.08 ( $P = 0.74$ ) and 0.14 ( $p = 0.586$ ).

The median DCI was lower among subjects without occluding contractions at fill volumes  $\geq 40$  ml or with RAC cessation ( $n = 5$ ), i.e. features potentially indicating a weak contractile response, median (IQR) median DCI 1096 (927 – 2545) mmHg•cm•s than those not meeting these criteria: median (IQR) median DCI 2340 (1762 – 4632);  $P = 0.033$ .

**Supplementary Table. Normal values of FLIP panometry in 30 subjects.** Results reflect combined results of the present cohort (n=20) and a previously described pilot cohort (n=10).<sup>2</sup> Minor study protocol differences that could contribute to result differences (particularly in maximum EGJ diameter and contractile response parameters) with the pilot cohort include a maximum distension volume of 60ml and time at each incremental distension volume of only 10-20 seconds. Additionally, HRM was not uniformly completed among this cohort. However, values do not substantially differ with those reported in the present cohort of 20 subjects. \*Catheter positioning in one subject prevented distensibility plateau (DP) quantification. \*\*n=28 subjects in which a repetitive antegrade contraction (RAC) pattern was observed. EGJ-DI – esophagogastric junction distensibility index

|                                                        | Median | 10 <sup>th</sup> -90 <sup>th</sup> percentile | Threshold                      | n (%) meeting threshold |
|--------------------------------------------------------|--------|-----------------------------------------------|--------------------------------|-------------------------|
| <b>EGJ-DI, 60ml (mm<sup>2</sup>/mmHg)</b>              | 5.8    | 3.4 – 9.3                                     | > 2.8                          | 30 (100)                |
| <b>Maximum EGJ diameter (mm)</b>                       | 23.3   | 21.4 – 30.4                                   | ≥ 18                           | 28 (93)                 |
| <b>DP, distal body (mm)</b>                            | 20.5   | 19.6 – 21.8                                   | ≥ 18                           | 28/29* (100)            |
| <b>Antegrade contractions</b>                          | --     |                                               | Present                        | 30 (100)                |
| <b>RAC pattern</b>                                     | --     |                                               | Present                        | 28 (93)                 |
| <b>Repetitive retrograde contraction (RRC) pattern</b> | --     |                                               | Absent                         | 30 (100)                |
| <b>Antegrade contractions <i>characteristics</i></b>   |        |                                               |                                |                         |
| <b>Lumen occlusion</b>                                 | --     | --                                            | At distension volumes 40-60 ml | 23 (77)                 |
| <b>Duration of RAC pattern (number of ACs)</b>         | 24     | 12 – 32                                       | ≥ 10                           | 25/28 (83)**            |
| <b>RAC pattern cessation</b>                           | --     | --                                            | Absent                         | 22/28 (79)**            |

| EGJ-DI<br>(mm <sup>2</sup> /mmHg) | FLIP distension volume (ml) |    |    |    |    |    | HRM Motility<br>diagnosis | Median IRP<br>(mmHg) | Median DCI<br>(mmHg·cm·s) | AET<br>(%) |
|-----------------------------------|-----------------------------|----|----|----|----|----|---------------------------|----------------------|---------------------------|------------|
|                                   | 20                          | 30 | 40 | 50 | 60 | 70 |                           |                      |                           |            |
| 2.9                               | ■                           | ■  | ■  | ■  | ■  | ■  | Normal                    | 15                   | 1090                      | 0.9        |
| 4.0                               | ■                           | ■  | ■  | ■  | ■  | ■  | Normal                    | 12                   | 4092                      | 1.9        |
| 4.2                               | ■                           | ■  | ■  | ■  | ■  | ■  | EGJOO                     | 18                   | 1097                      | 1.5        |
| 4.5                               | ■                           | ■  | ■  | ■  | ■  | ■  | Normal                    | 9                    | 1060                      | 0.1        |
| 4.9                               | ■                           | ■  | ■  | ■  | ■  | ■  | Normal                    | 15                   | 3801                      | 0          |
| 5.0                               | ■                           | ■  | ■  | ■  | ■  | ■  | Normal                    | 10                   | 2031                      |            |
| 5.1                               | ■                           | ■  | ■  | ■  | ■  | ■  | EGJOO                     | 16                   | 3078                      | 0.4        |
| 5.2                               | ■                           | ■  | ■  | ■  | ■  | ■  | Normal                    | 12                   | 1634                      | 1.4        |
| 5.6                               | ■                           | ■  | ■  | ■  | ■  | ■  | Normal                    | 14                   | 2196                      | 1.9        |
| 5.7                               | ■                           | ■  | ■  | ■  | ■  | ■  | Normal                    | 13                   | 1762                      |            |
| 5.8                               | ■                           | ■  | ■  | ■  | ■  | ■  | Normal                    | 12                   | 1535                      | 0.3        |
| 5.8                               | ■                           | ■  | ■  | ■  | ■  | ■  | Normal                    | 14                   | 7168                      | 0.7        |
| 6.0                               | ■                           | ■  | ■  | ■  | ■  | ■  | Normal                    | 8                    | 5592                      | 0.6        |
| 6.5                               | ■                           | ■  | ■  | ■  | ■  | ■  | IEM                       | 14                   | 763                       | 0.3        |
| 6.7                               | ■                           | ■  | ■  | ■  | ■  | ■  | Normal                    | 8                    | 2340                      | 0.5        |
| 6.7                               | ■                           | ■  | ■  | ■  | ■  | ■  | Normal                    | 9                    | 5652                      | 0.2        |
| 7.8                               | ■                           | ■  | ■  | ■  | ■  | ■  | Normal                    | 12                   | 3321                      | 1.5        |
| 8.2                               | ■                           | ■  | ■  | ■  | ■  | ■  | Normal                    | 7                    | 2340                      | 2.6        |
| 9.3                               | ■                           | ■  | ■  | ■  | ■  | ■  | Normal                    | 9                    | 4631                      | 0.4        |
| 11.9                              | ■                           | ■  | ■  | ■  | ■  | ■  | Normal                    | 8                    | 2018                      | 5.5        |

Occluding RACs
  Non-occluding RACs
  No RACs
